# Supplementary material for: Actionable Mutation Profiles of Non-Small Cell Lung Cancer patients from Vietnamese population
Source: PubMed Central journal article supplement (PMC7026432; doi:10.1038/s41598-020-59744-3), 2020-02-17
Supplement: 41598_2020_59744_MOESM1_ESM.pdf [file 41598_2020_59744_MOESM1_ESM.pdf]

## **Actionable Mutation Profiles of Non-Small Cell Lung Cancer patients from Vietnamese population**

Anh-Thu Huynh Dang, Vu-Uyen Tran, Thanh-Truong Tran , Hong-Anh Thi Pham, Dinh-Thong Le, Lam Nguyen, Ngoc-Vu Nguyen, Thai-Hoa Thi Nguyen, Chu Van Nguyen, Ha Thu Le, Mai-Lan Thi Nguyen, Vu Thuong Le, Phuc Huu Nguyen, Binh Thanh Vo, Hong-Thuy Thi Dao, Luan Thanh Nguyen, Thien-Chi Van Nguyen, Quynh-Tram Nguyen Bui, Long Hung Nguyen, Nguyen Huu Nguyen, Quynh-Tho Thi Nguyen, Truong Xuan Le, Thanh-Thuy Thi Do, Kiet Truong Dinh, Han Ngoc Do, Minh-Duy Phan, Hoai-Nghia Nguyen, Le Son Tran, Hoa Giang

**Table S1 Patients's clinical characteristics NA: unknown cases; AC: adenocarcinoma; SCC: squamous cell carcinoma; LL: left lung; RL: right lung; BC: bronchus; L: lung;**

| Case No. | Patient ID | Sex | Age | Smoking status | Histology | Tumor Location | Stages | Treatment details                   |
|----------|------------|-----|-----|----------------|-----------|----------------|--------|-------------------------------------|
| 1        | F0008      | M   | 49  | No             | AC        | LL             | IV     | No                                  |
| 2        | F0010      | F   | 64  | No             | AC        | RL             | NA     | NA                                  |
| 3        | F0014      | M   | 71  | NA             | SCC       | BC             | IIIA   | No                                  |
| 4        | F0017      | F   | 53  | No             | AC        | BC             | II     | No                                  |
| 5        | F0019      | F   | 64  | No             | AC        | LL             | IIIA   | No                                  |
| 6        | F0020      | M   | 71  | NA             | AC        | RL             | IV     | No                                  |
| 7        | F0022      | M   | 72  | NA             | AC        | RL             | IV     | No                                  |
| 8        | F0025      | M   | 47  | No             | AC        | RL             | IV     | No                                  |
| 9        | F0028      | M   | 59  | Yes            | AC        | LL             | IV     | NA                                  |
| 10       | F0033      | M   | 83  | NA             | NA        | NA             | NA     | NA                                  |
| 11       | F0034      | M   | 69  | NA             | AC        | LL             | NA     | No                                  |
| 12       | F0036      | F   | 80  | Yes            | AC        | RL             | IV     | NA                                  |
| 13       | F0038      | F   | 57  | No             | AC        | NA             | IV     | No                                  |
| 14       | F0039      | M   | 57  | NA             | NA        | L              | IV     | surgical resection                  |
| 15       | F0041      | F   | 71  | No             | AC        | L              | IV     | NA                                  |
| 16       | F0043      | M   | 51  | NA             | AC        | BC             | IV     | No                                  |
| 17       | F0045      | M   | 55  | NA             | AC        | RL             | IV     | No                                  |
| 18       | F0046      | M   | 50  | NA             | Others    | LL             | IV     | No                                  |
| 19       | F0047      | NA  | 70  | Yes            | AC        | L              | III    | NA                                  |
| 20       | F0048      | M   | 60  | NA             | AC        | RL             | III    | NA                                  |
| 21       | F0049      | M   | 52  | NA             | AC        | RL             | IVA    | No                                  |
| 22       | F0050      | M   | 64  | Yes            | SCC       | RL             | IV     | NA                                  |
| 23       | F0051      | M   | 76  | NA             | AC        | L              | IV     | NA                                  |
| 24       | F0052      | M   | 70  | NA             | AC        | L              | IV     | No                                  |
| 25       | F0054      | M   | 64  | NA             | AC        | LL             | IV     | surgical resection and chemotherapy |
| 26       | F0055      | M   | 69  | NA             | SCC       | L              | IV     | No                                  |
| 27       | F0057      | F   | NA  | No             | NA        | L              | III    | No                                  |
| 28       | F0058      | M   | 79  | NA             | AC        | RL             | II     | No                                  |
| 29       | F0059      | M   | 56  | Yes            | NA        | L              | IV     | Chemotherapy                        |
| 30       | F0060      | M   | 70  | NA             | AC        | BC             | IV     | NA                                  |
| 31       | F0061      | M   | 65  | NA             | AC        | RL             | IV     | No                                  |
| 32       | F0062      | M   | 48  | NA             | SCC       | BC             | IV     | No                                  |
| 33       | F0063      | M   | 60  | Yes            | AC        | L              | IV     | No                                  |
| 34       | F0064      | M   | 63  | Yes            | AC        | RL             | IV     | No                                  |
| 35       | F0065      | M   | 50  | NA             | AC        | Nodule         | IV     | No                                  |
| 36       | F0070      | M   | 73  | NA             | AC        | RL             | IV     | No                                  |

|    |       |    |    |     |    |        |      |                                    |
|----|-------|----|----|-----|----|--------|------|------------------------------------|
| 37 | F0071 | M  | 71 | Yes | AC | LL     | IV   | No                                 |
| 38 | F0072 | F  | 44 | No  | AC | RL     | T2   | surgical resection                 |
| 39 | F0073 | M  | 67 | No  | AC | LL     | IV   | No                                 |
| 40 | F0079 | M  | 56 | NA  | AC | L      | IV   | No                                 |
| 41 | F0081 | F  | 62 | No  | AC | BC     | IV   | No                                 |
| 42 | F0082 | M  | 69 | No  | AC | LL     | IIIB | NA                                 |
| 43 | F0083 | F  | 59 | No  | AC | BC     | IV   | NA                                 |
| 44 | F0084 | M  | 58 | Yes | AC | Nodule | NA   | NA                                 |
| 45 | F0085 | M  | 31 | Yes | AC | L      | IV   | No                                 |
| 46 | F0086 | M  | 53 | NA  | AC | BC     | IV   | NA                                 |
| 47 | F0088 | M  | 76 | NA  | AC | LL     | I    | No                                 |
| 48 | F0089 | F  | 66 | No  | AC | RL     | IV   | No                                 |
| 49 | F0090 | F  | 68 | No  | AC | BC     | IV   | NA                                 |
| 50 | F0091 | M  | 51 | NA  | AC | L      | III  | No                                 |
| 51 | F0093 | M  | 64 | NA  | AC | LL     | IV   | No                                 |
| 52 | F0094 | M  | 56 | NA  | AC | BC     | IV   | No                                 |
| 53 | F0096 | F  | 47 | No  | AC | Liver  | IV   | No                                 |
| 54 | F0098 | M  | 66 | Yes | AC | nodule | I    | No                                 |
| 55 | F0100 | M  | 65 | Yes | NA | NA     | IV   | No                                 |
| 56 | F0101 | F  | 55 | No  | AC | L      | IV   | No                                 |
| 57 | F0102 | F  | 43 | No  | AC | LL     | IV   | NA                                 |
| 58 | F0103 | M  | 64 | NA  | AC | BC     | III  | NA                                 |
| 59 | F0104 | M  | 48 | NA  | AC | L      | IV   | NA                                 |
| 60 | F0105 | M  | 70 | NA  | AC | NA     | IV   | NA                                 |
| 61 | F0106 | M  | 67 | NA  | AC | BC     | IV   | Chemotherapy and radiation therapy |
| 62 | F0107 | F  | 59 | No  | AC | L      | IV   | No                                 |
| 63 | F0108 | M  | 61 | NA  | AC | BC     | IV   | No                                 |
| 64 | F0110 | M  | 68 | NA  | NA | L      | IV   | No                                 |
| 65 | F0111 | F  | 57 | No  | NA | L      | IV   | No                                 |
| 66 | F0112 | M  | 63 | Yes | AC | BC     | IV   | No                                 |
| 67 | F0114 | M  | 70 | NA  | NA | L      | IV   | NA                                 |
| 68 | F0115 | M  | 66 | Yes | AC | RL     | IV   | No                                 |
| 69 | F0116 | M  | 36 | NA  | AC | L      | IV   | No                                 |
| 70 | F0117 | M  | 45 | Yes | AC | LL     | IIIB | No                                 |
| 71 | F0120 | M  | 52 | Yes | AC | RL     | IV   | No                                 |
| 72 | F0121 | F  | 65 | Yes | NA | L      | IV   | Chemotherapy                       |
| 73 | F0122 | M  | 82 | NA  | NA | L      | IV   | NA                                 |
| 74 | F0123 | M  | 42 | Yes | NA | RL     | IV   | No                                 |
| 75 | F0124 | F  | 69 | No  | NA | NA     | IV   | No                                 |
| 76 | F0125 | M  | 66 | Yes | AC | Nodule | IV   | NA                                 |
| 77 | F0126 | NA | NA | NA  | NA | L      | NA   | NA                                 |
| 78 | F0127 | M  | 66 | Yes | AC | L      | IV   | No                                 |
| 79 | F0129 | F  | 78 | No  | AC | RL     | IV   | NA                                 |
| 80 | F0131 | M  | 54 | Yes | AC | BC     | IV   | NA                                 |

|     |       |    |    |     |     |       |      |              |
|-----|-------|----|----|-----|-----|-------|------|--------------|
| 81  | F0133 | F  | 32 | No  | NEC | L     | IV   | No           |
| 82  | F0135 | M  | 27 | NA  | NA  | RL    | IIb  | No           |
| 83  | F0137 | F  | 59 | No  | AC  | BC    | IV   | No           |
| 84  | F0140 | M  | 59 | NA  | AC  | L     | IV   | No           |
| 85  | F0142 | F  | 66 | No  | AC  | L     | IV   | No           |
| 86  | F0143 | M  | 71 | Yes | AC  | L     | IV   | No           |
| 87  | F0144 | F  | 57 | No  | AC  | LL    | IV   | No           |
| 88  | F0145 | NA | NA | NA  | NA  | L     | NA   | NA           |
| 89  | F0146 | NA | NA | NA  | NA  | L     | NA   | NA           |
| 90  | F0148 | M  | 49 | NA  | NA  | L     | IV   | No           |
| 91  | F0151 | F  | 71 | No  | AC  | L     | IV   | No           |
| 92  | F0152 | NA | NA | NA  | NA  | L     | NA   | NA           |
| 93  | F0153 | NA | NA | NA  | NA  | L     | NA   | NA           |
| 94  | F0154 | F  | 69 | No  | NA  | L     | IV   | No           |
| 95  | F0155 | F  | 56 | No  | NA  | L     | IV   | No           |
| 96  | F0173 | M  | 69 | NA  | AC  | L     | IV   | No           |
| 97  | F0174 | M  | 78 | NA  | AC  | LL    | IV   | NA           |
| 98  | F0176 | M  | 67 | Yes | NA  | L     | IV   | No           |
| 99  | F0179 | M  | 72 | NA  | NA  | L     | IV   | No           |
| 100 | F0180 | F  | 62 | No  | AC  | RL    | IV   | No           |
| 101 | F0181 | F  | 76 | No  | AC  | RL    | IV   | No           |
| 102 | F0182 | M  | 66 | Yes | NA  | L     | IV   | No           |
| 103 | F0184 | F  | 74 | No  | AC  | Liver | IV   | Chemotherapy |
| 104 | F0185 | M  | 60 | NA  | SCC | RL    | IIIB | No           |
| 105 | F0186 | M  | 65 | NA  | NA  | L     | IV   | NA           |
| 106 | F0187 | F  | 60 | No  | AC  | LL    | IV   | No           |
| 107 | F0188 | M  | 69 | NA  | AC  | RL    | IV   | No           |
| 108 | F0190 | F  | 57 | No  | SCC | LL    | IV   | No           |
| 109 | F0191 | F  | 35 | No  | AC  | BC    | IV   | No           |
| 110 | F0193 | M  | 68 | NA  | NA  | L     | IV   | No           |
| 111 | F0195 | M  | 62 | NA  | AC  | LL    | IV   | No           |
| 112 | F0196 | M  | 67 | NA  | AC  | BC    | IV   | No           |
| 113 | F0197 | M  | 61 | NA  | AC  | BC    | IIIB | No           |
| 114 | F0198 | M  | 59 | NA  | AC  | L     | IV   | No           |
| 115 | F0199 | M  | 81 | NA  | AC  | L     | IV   | No           |
| 116 | F0200 | M  | 61 | Yes | AC  | BC    | IV   | No           |
| 117 | F0201 | M  | 68 | Yes | AC  | L     | IIIB | No           |
| 118 | F0202 | M  | 64 | NA  | SCC | RL    | IV   | No           |
| 119 | F0203 | M  | 59 | NA  | AC  | LL    | IV   | No           |
| 120 | F0206 | M  | 79 | NA  | AC  | L     | IV   | No           |
| 121 | F0207 | F  | 53 | No  | AC  | BC    | IV   | No           |
| 122 | F0208 | F  | 58 | No  | AC  | BC    | IV   | No           |
| 123 | F0209 | M  | 71 | NA  | AC  | LL    | IV   | No           |
| 124 | F0211 | M  | 54 | NA  | SCC | RL    | NA   | Yes          |
| 125 | F0212 | M  | 74 | NA  | AC  | BC    | IV   | Yes          |
| 126 | F0214 | M  | 62 | NA  | AC  | BC    | IV   | No           |

|     |       |   |    |     |     |         |      |                 |
|-----|-------|---|----|-----|-----|---------|------|-----------------|
| 127 | F0215 | F | 55 | No  | AC  | L       | IV   | TKI (13 months) |
| 128 | F0216 | M | 64 | NA  | AC  | LL      | IV   | No              |
| 129 | F0217 | M | 59 | NA  | AC  | nodule  | IV   | No              |
| 130 | F0218 | F | 60 | No  | AC  | L       | IIIB | No              |
| 131 | F0219 | M | 56 | NA  | NA  | L       | NA   | TKI (ongoing)   |
| 132 | F0221 | F | 55 | No  | AC  | Pleural | IV   | No              |
| 133 | F0222 | F | 71 | No  | AC  | BC      | IV   | No              |
| 134 | F0224 | F | 50 | No  | NA  | RL      | IV   | No              |
| 135 | F0225 | M | 61 | Yes | NA  | LL      | IV   | No              |
| 136 | F0226 | M | 57 | NA  | AC  | BC      | IV   | No              |
| 137 | F0227 | F | 49 | No  | AC  | L       | IV   | No              |
| 138 | F0228 | F | 45 | No  | NA  | BC      | IV   | No              |
| 139 | F0229 | F | 68 | No  | AC  | L       | NA   | No              |
| 140 | F0231 | M | 72 | NA  | AC  | RL      | IV   | No              |
| 141 | F0232 | M | 71 | NA  | AC  | BC      | IV   | No              |
| 142 | F0233 | M | 56 | Yes | AC  | LL      | IV   | No              |
| 143 | F0234 | M | 43 | NA  | NA  | L       | NA   | No              |
| 144 | F0235 | F | 69 | No  | SCC | LL      | IV   | No              |
| 145 | F0236 | M | 53 | NA  | AC  | L       | IV   | No              |
| 146 | F0237 | F | 42 | Yes | AC  | BC      | IV   | No              |
| 147 | F0238 | F | 79 | No  | NA  | L       | IV   | No              |
| 148 | F0239 | F | 64 | Yes | AC  | RL      | IV   | No              |
| 149 | F0240 | M | 73 | Yes | NA  | L       | II   | No              |
| 150 | F0241 | M | 58 | NA  | AC  | LL      | IV   | No              |
| 151 | F0242 | M | 43 | NA  | AC  | RL      | IV   | No              |
| 152 | F0243 | M | 42 | NA  | AC  | BC      | NA   | No              |
| 153 | F0244 | M | 49 | NA  | NA  | RL      | NA   | No              |
| 154 | F0245 | M | 59 | NA  | AC  | LL      | IV   | No              |
| 155 | F0246 | M | 70 | NA  | NA  | RL      | IIIB | No              |
| 156 | F0247 | M | 56 | NA  | NA  | L       | NA   | No              |
| 157 | F0249 | M | 67 | NA  | AC  | LL      | IV   | No              |
| 158 | F0250 | M | 65 | NA  | AC  | BC      | III  | No              |
| 159 | F0251 | M | 49 | NA  | AC  | BC      | IV   | No              |
| 160 | F0252 | M | 62 | NA  | NEC | nodule  | IV   | No              |
| 161 | F0254 | M | 61 | NA  | AC  | BC      | IV   | No              |
| 162 | F0256 | M | 67 | NA  | AC  | BC      | IV   | No              |
| 163 | F0258 | F | 59 | No  | NA  | BC      | IIIB | No              |
| 164 | F0259 | M | 75 | NA  | NA  | LL      | NA   | No              |
| 165 | F0260 | M | 67 | NA  | SCC | BC      | II   | NA              |
| 166 | F0261 | M | 70 | Yes | NA  | L       | IV   | No              |
| 167 | F0262 | M | 60 | Yes | AC  | L       | IV   | No              |
| 168 | F0263 | M | 89 | NA  | SCC | L       | IV   | No              |
| 169 | F0264 | M | 60 | NA  | AC  | L       | IV   | No              |
| 170 | F0265 | M | 45 | NA  | NA  | L       | IV   | No              |
| 171 | F0267 | M | 62 | NA  | AC  | L       | IIIb | No              |
| 172 | F0268 | M | 57 | NA  | AC  | L       | IV   | No              |

|     |       |   |    |     |     |        |     |                    |
|-----|-------|---|----|-----|-----|--------|-----|--------------------|
| 173 | F0269 | M | 52 | NA  | AC  | BC     | NA  | No                 |
| 174 | F0270 | F | 59 | No  | AC  | LL     | IV  | TKI                |
| 175 | F0272 | F | 67 | No  | AC  | RL     | IV  | No                 |
| 176 | F0273 | M | 59 | NA  | NA  | RL     | NA  | No                 |
| 177 | F0274 | M | 58 | NA  | NA  | BC     | NA  | No                 |
| 178 | F0275 | M | 65 | NA  | AC  | BC     | NA  | No                 |
| 179 | F0276 | M | 73 | Yes | AC  | RL     | IV  | No                 |
| 180 | F0277 | M | 71 | NA  | SCC | BC     | NA  | No                 |
| 181 | F0278 | M | 59 | NA  | NA  | BC     | NA  | No                 |
| 182 | F0279 | F | 63 | No  | AC  | L      | IV  | No                 |
| 183 | F0280 | F | 46 | No  | AC  | nodule | IV  | surgical resection |
| 184 | F0281 | F | 50 | No  | SCC | RL     | IV  | No                 |
| 185 | F0282 | M | 65 | NA  | NA  | LL     | NA  | No                 |
| 186 | F0283 | F | 49 | No  | AC  | L      | IV  | No                 |
| 187 | F0284 | M | 49 | NA  | AC  | L      | IV  | No                 |
| 188 | F0285 | M | 64 | NA  | AC  | LL     | IV  | No                 |
| 189 | F0287 | F | 57 | No  | AC  | RL     | IV  | No                 |
| 190 | F0288 | M | 62 | NA  | AC  | BC     | NA  | No                 |
| 191 | F0289 | M | 65 | NA  | SCC | LL     | NA  | No                 |
| 192 | F0290 | F | 46 | No  | NA  | NA     | IV  | No                 |
| 193 | F0292 | M | 65 | Yes | NA  | NA     | III | No                 |
| 194 | F0293 | F | 62 | No  | AC  | BC     | IV  | No                 |
| 195 | F0294 | M | 61 | NA  | AC  | LL     | IV  | No                 |
| 196 | F0295 | F | 68 | No  | AC  | LL     | IV  | TKI (ongoing)      |
| 197 | F0297 | M | 65 | NA  | SCC | LL     | NA  | No                 |
| 198 | F0298 | F | 57 | No  | NA  | RL     | IV  | No                 |
| 199 | F0300 | F | 60 | No  | AC  | LL     | IV  | No                 |
| 200 | F0301 | M | 59 | Yes | AC  | RL     | IV  | No                 |
| 201 | F0302 | F | 59 | No  | NA  | RL     | IV  | No                 |
| 202 | F0304 | M | 42 | NA  | AC  | LL     | IV  | No                 |
| 203 | F0305 | F | 67 | No  | AC  | BC     | IV  | No                 |
| 204 | F0306 | M | 71 | No  | AC  | BC     | III | No                 |
| 205 | F0307 | M | 66 | NA  | NA  | RL     | IV  | No                 |
| 206 | F0308 | F | 72 | No  | AC  | L      | III | No                 |
| 207 | F0309 | M | 60 | Yes | AC  | L      | IV  | Yes                |
| 208 | F0310 | F | 74 | No  | AC  | RL     | IV  | No                 |
| 209 | F0311 | F | 46 | No  | AC  | RL     | IV  | No                 |
| 210 | F0312 | M | 55 | NA  | NA  | L      | IV  | No                 |
| 211 | F0313 | F | 63 | No  | AC  | L      | IV  | No                 |
| 212 | F0314 | F | 57 | No  | AC  | RL     | IV  | No                 |
| 213 | F0315 | M | 59 | NA  | AC  | L      | IV  | No                 |
| 214 | F0316 | M | 61 | Yes | AC  | Brain  | IV  | No                 |
| 215 | F0317 | M | 61 | NA  | NA  | L      | IV  | No                 |
| 216 | F0319 | F | 34 | No  | AC  | BC     | IV  | NA                 |
| 217 | F0320 | F | 57 | No  | SCC | RL     | IV  | No                 |
| 218 | F0321 | M | 53 | NA  | AC  | RL     | IV  | Yes                |

|     |       |   |    |     |        |         |      |              |
|-----|-------|---|----|-----|--------|---------|------|--------------|
| 219 | F0322 | M | 48 | NA  | AC     | L       | IV   | No           |
| 220 | F0323 | F | 53 | No  | AC     | L       | IV   | No           |
| 221 | F0324 | F | 68 | No  | AC     | LL      | IV   | No           |
| 222 | F0326 | M | 67 | Yes | AC     | RL      | IIIB | No           |
| 223 | F0327 | M | 75 | Yes | AC     | L       | III  | No           |
| 224 | F0328 | F | 34 | No  | AC     | BC      | IV   | No           |
| 225 | F0329 | M | 53 | No  | AC     | RL      | IIIB | No           |
| 226 | F0330 | M | 79 | NA  | NA     | LL      | NA   | No           |
| 227 | F0331 | F | 65 | No  | NA     | BC      | IV   | No           |
| 228 | F0333 | M | 54 | NA  | NA     | BC      | NA   | No           |
| 229 | F0334 | M | 64 | NA  | AC     | BC      | NA   | No           |
| 230 | F0335 | M | 60 | No  | SCC    | L       | II   | No           |
| 231 | F0336 | F | 62 | No  | AC     | RL      | IVA  | No           |
| 232 | F0337 | M | 82 | Yes | AC     | BC      | IVA  | No           |
| 233 | F0338 | M | 51 | Yes | AC     | BC      | IIIC | No           |
| 234 | F0339 | F | 64 | No  | NA     | L       | IV   | No           |
| 235 | F0340 | M | 42 | NA  | AC     | BC      | IV   | No           |
| 236 | F0341 | F | 71 | No  | AC     | LL      | IV   | No           |
| 237 | F0343 | F | 47 | Yes | NA     | Pleural | IV   | No           |
| 238 | F0344 | M | 71 | NA  | AC     | L       | IV   | No           |
| 239 | F0346 | F | 49 | No  | AC     | RL      | IV   | No           |
| 240 | F0349 | M | 77 | NA  | AC     | LL      | II   | No           |
| 241 | F0350 | M | 63 | No  | AC     | RL      | IV   | No           |
| 242 | F0352 | F | 42 | No  | NA     | L       | IV   | No           |
| 243 | F0353 | F | 39 | No  | AC     | BC      | IV   | No           |
| 244 | F0354 | M | 60 | NA  | NA     | L       | NA   | No           |
| 245 | F0355 | M | 60 | NA  | SCC    | LL      | IV   | Chemotherapy |
| 246 | F0356 | F | 55 | No  | NA     | BC      | IV   | No           |
| 247 | F0357 | M | 59 | NA  | AC     | nodule  | IV   | No           |
| 248 | F0359 | F | 54 | No  | AC     | BC      | II   | No           |
| 249 | F0360 | M | 50 | NA  | AC     | BC      | IIIB | No           |
| 250 | F0361 | F | 66 | No  | AC     | BC      | IV   | No           |
| 251 | F0362 | M | 60 | NA  | NA     | BC      | NA   | No           |
| 252 | F0363 | F | 44 | No  | AC     | L       | IV   | No           |
| 253 | F0365 | M | 56 | NA  | NA     | L       | NA   | No           |
| 254 | F0366 | F | 60 | No  | AC     | LL      | IV   | No           |
| 255 | F0367 | M | 66 | NA  | NA     | L       | NA   | No           |
| 256 | F0368 | M | 60 | NA  | NA     | L       | NA   | No           |
| 257 | F0369 | F | 59 | No  | SCC    | L       | IV   | No           |
| 258 | F0370 | F | 54 | No  | AC     | L       | IV   | No           |
| 259 | F0371 | M | 61 | NA  | NA     | L       | NA   | No           |
| 260 | F0372 | F | 67 | No  | AC     | RL      | IIIB | No           |
| 261 | F0373 | M | 68 | NA  | AC     | L       | IV   | No           |
| 262 | F0374 | F | 61 | No  | NA     | BC      | NA   | No           |
| 263 | F0375 | M | 47 | Yes | NA     | BC      | IV   | No           |
| 264 | F0376 | M | 53 | NA  | Others | LL      | IV   | No           |

|     |       |    |    |     |        |    |      |                           |
|-----|-------|----|----|-----|--------|----|------|---------------------------|
| 265 | F0377 | F  | 77 | No  | NA     | L  | NA   | No                        |
| 266 | F0378 | M  | 78 | NA  | NA     | L  | NA   | No                        |
| 267 | F0379 | F  | 70 | No  | AC     | LL | IV   | No                        |
| 268 | F0380 | M  | 66 | NA  | SCC    | LL | IV   | No                        |
| 269 | F0381 | F  | 70 | No  | AC     | RL | IV   | No                        |
| 270 | F0382 | M  | 66 | Yes | AC     | LL | IV   | No                        |
| 271 | F0383 | M  | 69 | NA  | AC     | L  | IV   | No                        |
| 272 | F0384 | M  | 86 | NA  | AC     | L  | IV   | No                        |
| 273 | F0385 | M  | 62 | NA  | AC     | BC | NA   | No                        |
| 274 | F0386 | M  | 67 | NA  | AC     | BC | NA   | No                        |
| 275 | F0388 | F  | 32 | No  | AC     | RL | IV   | No                        |
| 276 | F0389 | M  | 58 | Yes | AC     | RL | IV   | No                        |
| 277 | F0390 | F  | 46 | No  | AC     | NA | IV   | No                        |
| 278 | F0391 | NA | 56 | NA  | AC     | L  | IV   | No                        |
| 279 | F0392 | F  | 57 | No  | AC     | L  | IV   | No                        |
| 280 | F0393 | F  | 66 | No  | NA     | L  | NA   | No                        |
| 281 | F0394 | M  | 53 | NA  | AC     | RL | IV   | No                        |
| 282 | F0395 | F  | 49 | No  | AC     | L  | IIB  | No                        |
| 283 | F0396 | M  | 58 | NA  | AC     | B  | IV   | No                        |
| 284 | F0397 | F  | 75 | No  | AC     | LL | IV   | No                        |
| 285 | F0398 | M  | 66 | NA  | AC     | L  | IV   | No                        |
| 286 | F0400 | F  | 60 | No  | AC     | RL | IV   | No                        |
| 287 | F0401 | F  | 64 | No  | AC     | L  | IIIB | No                        |
| 288 | F0402 | F  | 47 | No  | AC     | RL | IV   | Chemotherapy              |
| 289 | F0403 | F  | 69 | No  | AC     | LL | IV   | No                        |
| 290 | F0404 | M  | 61 | NA  | AC     | RL | IV   | No                        |
| 291 | F0405 | M  | 56 | Yes | AC     | L  | IV   | No                        |
| 292 | F0406 | M  | 72 | NA  | Others | RL | IV   | No                        |
| 293 | F0407 | F  | 69 | No  | AC     | LL | IV   | No                        |
| 294 | F0411 | F  | 36 | No  | AC     | RL | IV   | No                        |
| 295 | F0412 | F  | 45 | No  | AC     | NA | IV   | No                        |
| 296 | F0413 | M  | 70 | No  | AC     | NA | IV   | No                        |
| 297 | F0414 | M  | 65 | NA  | AC     | NA | IVa  | No                        |
| 298 | F0415 | M  | 43 | No  | AC     | NA | IV   | Chemotherapy              |
| 299 | F0416 | F  | 65 | No  | AC     | RL | IV   | Chemotherapy              |
| 300 | F0417 | M  | 53 | NA  | AC     | LL | IV   | No                        |
| 301 | F0418 | M  | 60 | Yes | AC     | NA | IV   | No                        |
| 302 | F0419 | M  | 62 | Yes | AC     | NA | III  | No                        |
| 303 | F0421 | M  | 61 | Yes | AC     | NA | IV   | No                        |
| 304 | F0422 | F  | 35 | No  | SCC    | LL | IV   | No                        |
| 305 | F0423 | M  | 69 | NA  | AC     | LL | IIIb | TKI<br>(Iressa, 6 months) |
| 306 | F0424 | F  | 66 | No  | SCC    | RL | IIIB | No                        |
| 307 | F0426 | M  | 71 | NA  | AC     | NA | NA   | No                        |
| 308 | F0427 | M  | 72 | NA  | NA     | NA | NA   | No                        |
| 309 | F0428 | F  | 64 | No  | AC     | NA | IV   | No                        |



|     |       |   |    |     |     |       |      |                    |
|-----|-------|---|----|-----|-----|-------|------|--------------------|
| 310 | F0429 | F | 56 | NA  | AC  | NA    | IV   | No                 |
| 311 | F0431 | F | 81 | No  | AC  | LL    | IV   | No                 |
| 312 | F0433 | F | 67 | No  | AC  | LL    | IV   | No                 |
| 313 | F0434 | F | 62 | NA  | AC  | BC    | IV   | No                 |
| 314 | F0435 | M | 42 | NA  | AC  | NA    | IV   | NA                 |
| 315 | F0436 | M | 54 | NA  | AC  | L     | IVB  | No                 |
| 316 | F0437 | F | 57 | No  | AC  | Brain | IV   | surgical resection |
| 317 | F0438 | M | 69 | NA  | AC  | BC    | IV   | No                 |
| 318 | F0439 | M | 63 | NA  | AC  | L     | IV   | No                 |
| 319 | F0440 | F | 60 | NA  | NA  | NA    | IV   | No                 |
| 320 | F0441 | F | 46 | NA  | AC  | L     | IV   | No                 |
| 321 | F0442 | F | 58 | No  | NA  | L     | IV   | No                 |
| 322 | F0443 | F | 70 | NA  | AC  | RL    | IV   | Yes                |
| 323 | F0445 | M | 48 | NA  | AC  | BC    | IV   | No                 |
| 324 | F0446 | F | 52 | No  | NA  | NA    | NA   | No                 |
| 325 | F0447 | F | 58 | No  | AC  | NA    | IV   | TKI (tarceva)      |
| 326 | F0448 | M | 62 | NA  | AC  | NA    | IV   | No                 |
| 327 | F0450 | F | 65 | No  | AC  | RL    | III  | No                 |
| 328 | F0451 | F | 62 | No  | AC  | RL    | IV   | No                 |
| 329 | F0452 | F | 41 | No  | AC  | LL    | IV   | No                 |
| 330 | F0453 | F | 72 | No  | AC  | RL    | IV   | No                 |
| 331 | F0455 | M | 63 | Yes | AC  | NA    | III  | Chemotherapy       |
| 332 | F0456 | M | 60 | NA  | SCC | NA    | IV   | NA                 |
| 333 | F0457 | M | 75 | NA  | SCC | NA    | IV   | No                 |
| 334 | F0459 | M | 55 | NA  | AC  | RL    | III  | NA                 |
| 335 | F0460 | F | 79 | No  | NA  | NA    | IV   | No                 |
| 336 | F0461 | F | 65 | No  | AC  | NA    | IV   | No                 |
| 337 | F0462 | F | 44 | No  | NA  | NA    | IV   | No                 |
| 338 | F0463 | M | 54 | NA  | AC  | L     | IV   | NA                 |
| 339 | F0464 | M | 65 | NA  | NA  | NA    | NA   | NA                 |
| 340 | F0465 | M | 80 | Yes | AC  | NA    | IV   | No                 |
| 341 | F0466 | F | 45 | No  | AC  | LL    | IV   | Chemotherapy       |
| 342 | F0467 | F | 62 | No  | AC  | L     | IV   | No                 |
| 343 | F0468 | M | 52 | NA  | AC  | NA    | NA   | No                 |
| 344 | F0469 | F | 65 | No  | AC  | NA    | IV   | No                 |
| 345 | F0470 | M | 60 | NA  | SCC | RL    | IV   | No                 |
| 346 | F0471 | M | 62 | Yes | AC  | LL    | IV   | No                 |
| 347 | F0472 | M | 73 | NA  | NA  | NA    | NA   | NA                 |
| 348 | F0473 | F | 57 | No  | NA  | NA    | IV   | No                 |
| 349 | F0475 | M | 82 | Yes | AC  | NA    | IIIB | No                 |
| 350 | F0476 | M | 62 | NA  | NA  | NA    | NA   | No                 |

**Table S2 EGFR mutation results determined by massively parallel sequencing and ddPCR**

(-): mutations not detected

| Case No. | Sample ID | Massively Parallel Sequencing |         | ddPCR             |         |
|----------|-----------|-------------------------------|---------|-------------------|---------|
|          |           | Mutation                      | VAF (%) | Mutation          | VAF (%) |
| 1        | LBL015    | <i>EGFR</i> L858R             | 65      | <i>EGFR</i> L858R | 57.0    |
| 2        | LBL017    | <i>EGFR</i> L858R             | 90      | <i>EGFR</i> L858R | 82.3    |
| 3        | L10055    | <i>EGFR</i> L858R             | 55      | <i>EGFR</i> L858R | 28.0    |
| 4        | L10019    | <i>EGFR</i> del19             | 11      | <i>EGFR</i> del19 | 12.7    |
| 5        | L10021    | (-)                           |         | <i>EGFR</i> del19 | 0.5     |
| 6        | L10036    | <i>EGFR</i> del19             | 44      | <i>EGFR</i> del19 | 24.8    |
| 7        | L10072    | <i>EGFR</i> del19             | 50      | <i>EGFR</i> del19 | 58.2    |
| 8        | L10076    | <i>EGFR</i> del19             | 34      | <i>EGFR</i> del19 | 40.9    |
| 9        | LBL021    | (-)                           |         | <i>EGFR</i> del19 | 3.9     |
| 10       | LBL033    | <i>EGFR</i> del19             | 20      | <i>EGFR</i> del19 | 24.6    |
| 11       | L10022    | <i>EGFR</i> L858R             | 37      | <i>EGFR</i> L858R | 22.3    |
|          |           | <i>EGFR</i> T790M             | 43      | <i>EGFR</i> T790M | 28.2    |
| 12       | LBL026    | <i>EGFR</i> del19             | 23      | <i>EGFR</i> del19 | 27.6    |
| 13       | LBL030    | <i>EGFR</i> del19             | 10      | <i>EGFR</i> del19 | 6.8     |
| 14       | LBL001    | (-)                           |         | (-)               |         |
| 15       | LBL002    | (-)                           |         | (-)               |         |
| 16       | LBL003    | (-)                           |         | (-)               |         |
| 17       | LBL004    | (-)                           |         | (-)               |         |
| 18       | LBL005    | (-)                           |         | (-)               |         |
| 19       | LBL006    | (-)                           |         | (-)               |         |
| 20       | LBL007    | (-)                           |         | (-)               |         |
| 21       | LBL008    | (-)                           |         | (-)               |         |
| 22       | LBL009    | (-)                           |         | (-)               |         |
| 23       | LBL012    | (-)                           |         | (-)               |         |
| 24       | LBL013    | (-)                           |         | (-)               |         |
| 25       | LBL014    | (-)                           |         | (-)               |         |
| 26       | LBL016    | (-)                           |         | (-)               |         |
| 27       | LBL020    | (-)                           |         | (-)               |         |
| 28       | LBL022    | (-)                           |         | (-)               |         |
| 29       | LBL023    | (-)                           |         | (-)               |         |
| 30       | LBL024    | (-)                           |         | (-)               |         |
| 31       | LBL025    | (-)                           |         | (-)               |         |
| 32       | LBL027    | (-)                           |         | (-)               |         |
| 33       | LBL028    | (-)                           |         | (-)               |         |
| 34       | LBL029    | (-)                           |         | (-)               |         |
| 35       | LBL031    | (-)                           |         | (-)               |         |
| 36       | LBL034    | (-)                           |         | (-)               |         |
| 37       | LBL036    | (-)                           |         | (-)               |         |
| 38       | LBL037    | (-)                           |         | (-)               |         |
| 39       | LBL040    | (-)                           |         | (-)               |         |

|    |        |     |  |     |  |
|----|--------|-----|--|-----|--|
| 40 | LBL041 | (-) |  | (-) |  |
|----|--------|-----|--|-----|--|

**Table S3 Probe sequences for detecting *ALK* and *ROS1* fusions**

| Number | ID       | Sequence                                                                                                                  |
|--------|----------|---------------------------------------------------------------------------------------------------------------------------|
| 1      | ALK19_1  | GGTGAGTGCACAGAGCCCCAGGGACTCCCAAGGGGGCAGGAAGGCAGGACTGAATAGTGTCTCAGGCTGTGCCACAGGTGCCAAGGTGCACTTCGTTATGCTAGTCCCTGGAATTGGGT   |
| 2      | ALK19_2  | GGGGTGGTGATTAGGGCAGCCCAGGCCAAGCCAAAACGGAAGCTCCCAACCTTCCCCACCAGAGCAGCTGCAGTTCCTGAGGAGCCCCTGATTCTGCACCTCAGCCCCGTGTGTATC     |
| 3      | ALK19_3  | CTCTGGCTGATCAGGGGTGGGGAGCTCCTTCAGTGTCCATCACGATGGTAAAGCTCGCCCCACCCTAGACGTCACTTCTAGCTCCACATGCTTCCACCGGCGCAGCTCTGTTT         |
| 4      | ALK19_4  | GGCTCCCACCCTATGTAATGCACTAGCCACTTCCCCAAACCAGCCCTCCACCACCCTCCAGGCAGAGAGATAGGAAAATCGGTTTCTGAGTATATTTCTGTTCCAGCTGTGAGCCAA     |
| 5      | ALK19_5  | GGTGAGCTGACCTGCAGGTCACAGAGAAGCTCAGTGTGGTCCCAACCAGCTCTTACTGCTGGCAGAGACATGCCAGGACAGATGGGCAGAGGCTTAAAAGGGCAGAGGGAAAAGGCTCTT  |
| 6      | ALK19_6  | GAGAGCCCTCGCAGGCCAGGCCCTGCAGGCAAAGGGATCTGCCGGTAGAAGGGAGATGGCAGCACACACTGTGTCCCATATGGTCCATCCCTCAAAGGGACAGGATAATAGGAGCTA     |
| 7      | ALK19_7  | ACACTTGTGATGTTACTACGTGCTCGCAATTTACACATTTCAATTCATTGATCCTCAGGTAACCCTAATCTGATCACGGTCGGTCCATTGCATAGAGGAGGGAAGTACAGCATA        |
| 8      | ALK19_8  | GCGGGTGACTATTTGCCCTGGCCCATGTGTGGGGGGCTGGGCTTTACACACAGAATCTACCCTGAATCACAATTTTGTCTGGCTTCCATGGAGTTTGCTTCCAGAACATCCTCA        |
| 9      | ALK19_9  | CATGTAGGAGTATAATGGTCACTCACATTGGTAGAGCTCTTTAGGATTTTTCAAACCATTTTATGTTGGTGAATTCATTTTATTGACAACCTAGAGGGTGGGGAGTGGCAGTGGTTA     |
| 10     | ALK19_10 | GGGAAACAGGGCAGGAGTTACCATCCCTGCCTACAGAGAGGGAAAAGTGCAGTCCAAAGAGGCTCTGTGACCTGGTCCCTCATGGCTCAGCTTGTAAAGTAAAGAGGCGGAATTAGAGCAC |
| 11     | ALK19_11 | AGATCCCAGACACCAATTCAGAGATCTTTTCATGATGTGGCTCTTCTCCAACCTGTGGCTGGCAGTTCTCCAACCTATAGGAAACACAAGTACCAAGATCCCAGCTGCACCCTCAA      |
| 12     | ALK19_12 | TCCACTGCTGTGATTGCACTGAAGCTGCCCTACCAATGGCTGAGCACAGCAGAAATACTAAGGCAGGCCAATTCCTGGGAGTCATGGGACTCCTCTGATGACTGACTTTGGTCCAGAA    |
| 13     | ALK19_13 | CCCCTTAGGGCCTTGTGAAACTTCTTAGGCTCCATGGCACCCAGGGTCTTCCACCACCTTCCCTCCCTCCCTCGTTACGTGGGGTTATACTTGAACACAGTCTGCTGGTTAC          |
| 14     | ALK19_14 | CCAGCCTCCCTGGCTCCCTCCCATTTCTCTCATGGGCATTTCTTCTAATAAAAATCTGCAGACCATATTGGGTCTAATCCCATCTCCAGTCTGCTTCTTGGAGGAACCAGACTAACAT    |
| 15     | ALK19_15 | GACTCTGCCCTATATAATAACAATAATTTTTCCATATATCTGATTTTTAGCTTTGCATTTACTTTAAATCATGCTTCAATTAAGACACACCTTCTTTAATCATTTTATTAGTATTTT     |
| 16     | ALK19_16 | TAAGTATGATGGAAAGGTTACAGAGCTCAGGGGAGGATATGGAGATCCAGGGAGGCTTCTGTAGGAAGTGGCTGTGTAGTGTCTAAGGGCCAGGCTGCCAGGCCATGTTGCAGCTGAC    |
| 17     | ALK20_1  | GGTGAGCGCCTGCTGCCGTCTGGGAGGAGAGGGGTGCAGTGTAGGGCTGAATGTTATCACAGCACCGCAGACTCCTCTAGCCACAAAAGGCCGGCAGAGCCCTCCCTATGGGCACCC     |
| 18     | ALK20_2  | CTAGCCCTCCTAGGAGGACAAGCCTTGACATTCAGGGCCATGTATGTTGGCTTACATTAACCTCCATAGTTTATGGAGTTTATACAATGAGAGGAGAACCAGGGCTCTCCTCAAATTC    |
| 19     | ALK20_3  | TTCAGATGTGCTCTCTCAAGTCTACCTGGCTCCCTTCCCTCAGGGGAGCAGGGGAGCAAAGGGCCCTCCTCTGAGCATCTAGAGCAACTGCGCCTTCTCTGTCACTACTGGAAA        |
| 20     | ALK20_4  | TACTCCCAGCCAGTACCACAGTGTCTGTCTCTCCCAAGGAGCATGAACCTCCCCGGGAAAAGCCATGGCTTATGCACCCTGTGTCCCTGGCAAATATCAGAGACTCAATAACT         |
| 21     | ALK20_5  | ACTGATTGAATGAATAAACATTTGACCATTGTCATGAGTCCCTGGTTGGAATCCTTCTTACCAGTTTTCAGGTGAAGAAGTGGAGCCCGAGATTGCATAGCAAAGCCATGTTGAGGGTA   |
| 22     | ALK20_6  | TTACTCTGAGTGTGTATGTTACCCCGCTCTCGTGTGTTGTCACATAAATGTGACGCCAGGCTCAGGACCCAGCTGCCTCATTATTGTGGCTGTTGACTCTGTCTCTCTCTGTG         |
| 23     | ALK21_1  | GGTAAGAAGTGGCTCACTCTGAGCCTGCCCTGGCTTGGGACTCTGTAGGCTGCAGTCTCAGCTCACAGCTCCTCTCTCCCCACCCTCCCTCTCTGCCCCAG                     |
| 24     | ROS131_1 | TGGAATACAATGAGTTTTACCATGTTAAAACCTCATGCAGCCAAGGCTCTGCTTATGCTGTAAATATCACAATCTACAACCTTATACTTCATATAATGTCAGAGTAGTGGTGGTTTAT    |

|    |           |                                                                                                                           |
|----|-----------|---------------------------------------------------------------------------------------------------------------------------|
| 25 | ROS131_2  | AAGACGGGAGAAAATAGCACCTCACTTCCAGAAAGCTTAAAGACAAAAGGTGAGTACTAACATACTCAATACTCAGAAAACCTGTGTTTTTCTTATCACTTATTTCACTAA           |
| 26 | ROS131_3  | TCCTAGAGATATATGAAATTGTTCTTTAAAAGCAGTACATTATTATTCTAGAAGTGAATGAAGAAATTCAGAAAATATAGGAGACCTTGCAGGCAGTAATGAAATAACTGGCTGGG      |
| 27 | ROS131_4  | TCTGGCTGGATCCTGAACTGGGCAAAATTACTTCTTCTTTCAGTATCCTTATTTTCATGTCTAGCTATGACAATTTATGGTGATAACTATATGAAAATAGTGTACTGAATGTTCAAAAA   |
| 28 | ROS131_5  | ATATTTATTGGCTACTATATTTGAGATACTAGGATGAAAAATATAAGAAGTTCATTAATAAATAACTAGTGTCTGAAAGATATACCTTAACTCTGAGATGAGCTCTATAAGAATGGAAG   |
| 29 | ROS131_6  | GAACAAAGATCTAGAACCAAAAATACCATTTGACCTAGAAAATTACTTAGTACATACCCAAAGGAATATAAATCATTCTATTACAAAAGATACATGCACACGTATGTTCACTGTAGC     |
| 30 | ROS131_7  | ACTATTCACAATAATGAATCATTGGAATCAACCCAATGCCCGTCAACATTAGACTGGTTGAAGCAAATGGGTACATATACACCATGGCATACTATGCAGCCATAAAAAGGAATGAGA     |
| 31 | ROS131_8  | TAATGTTTTTTTGCAGGGATATGGATGAAGCTGGAAGCTATTAACCTCAGCAAATAATTAGGAACAGAAAACCAAACTGCCTGTTCTCACTTACAAGTGGGAGCTGAACAATGAGA      |
| 32 | ROS131_9  | ACGCATGGACACAAGGAGGGGAACAACACACACTGGGGCTGTGAGGGGGAGGGGTGGGGGGATAGAGAGTATTAGGAAAATAGCTAATGCATGCTGGGCTTAATACCTAGGTGATGGT    |
| 33 | ROS131_10 | TTGCTAGGTGTAGTAAACCACCATGGGACATGTTTACCCATGTAACAACTTACAGTCTGCACATGTACCCAGAACTAAAAATAAAAAATTTGAAAAAAGAATGGAGGGAAAATG        |
| 34 | ROS131_11 | CTCCAAAACCTTATGATAGTTTTCTTTATTTTCATTTATCACTTATTTTGTTCAGATTGAGATATATTGTTAATCTTATCACCAATTATCAAAATCCATCACTAATAAAAACTTCAAATG  |
| 35 | ROS131_12 | CTCATTTAAAAATATGTAATCATATAAGAATATTTCTGAATATTTCTTTTTTAAAAATTTCTTCTTAAAAAATAAGATACATGTGCAGAACGTGCAGGGTTGTACATAGGTATACATGT   |
| 36 | ROS131_13 | GCCATGGTGGTTTGCTGCACCTATTGACCTGTCTCTAAGTTCCTCCCTCAGCTCTATCCCTCAACAGGCCCTGGTGTGTGCTGTTCCCTCTCTGTATCCATGTGTTCTCAATGTT       |
| 37 | ROS131_14 | CAACTCCCATTATGAGTGAGAACACGTGCTGTTTTGTTCTCTGTTCTGTGTTAGGTTGCTGAGGATGATGACTCCAGCTTCATCCATGTCCCTGCAAAGGACATGATCTATTCTTT      |
| 38 | ROS131_15 | CTTATGGCTGCATAGTATTCATGGTGTATATGTACCACATTTTCTTTATCTGTTTTGTCATTGATGGATTGGCTTGGTTCCATGTCTTTGTTATTGTAACAGTGTGCAGTAAACATA     |
| 39 | ROS131_16 | CATGTGCATGTGCTTTATAGTAGAGTGATTTATACTCCTTTGGGTATGTACTCAATAATGAGATTACTGGGTCAAATGTTATTCTGGTTCTAGATCCTTGAGGAATTGCCACTACTGC    |
| 40 | ROS131_17 | TTCCACAATGGTTGAAATAATTTACTTTACCACCAACAGTGAAAAGTATTCCTATTTCTCCACACCCTCATCAGCATCTATTGTTTCTGACTTTTTAATAGTTGCCATTCTGACTCGC    |
| 41 | ROS131_18 | GTGAGATGGTATCTCATTGTAGTTTTGATTTGACTCCTCTGATGATCAGTGATGTTGAGCTTTTTTTCATACGTTTTATTGGCTGCATAAATCCCTTTTTGAGAAGTGTCTGTTCATATCT |
| 42 | ROS131_19 | TTTGCCCACTTTTTGATGGGGTTGTCTGTCTTTTTCTGTAAATATGTTAAGTTCCTGTACATTCTGGATATTAGCCCTTTGTCAGATGGATAGATTGCAAAATTTTTCTCCATTCT      |
| 43 | ROS131_20 | GTAGGTTGTCTGTTCACTCTGATGATAGTTTCTTTTGTGTACAGAAGCTCTTAGTTAGTTAGATCCATTTGTCTATTTTGGCTTTTGTGCCATTGCTTTTGGTGTGTTAGTCATG       |
| 44 | ROS131_21 | AAGTCTTTGCCATGCCTATGTCCTGAATGGTATTGCCTAGGTTTTCTTAGGGTTTTTATGGTTTTGGTTTTACATTTAAGTGTTAATCCATCTTGAGTTAAATTTGTATAAGGT        |
| 45 | ROS131_22 | TAAGGAATGGGCCAGTTTCAGTTTTCTGCATATGGCTAGCCAGTTTTCCAGCACCATTACTAAATAGGAGATCCTTCTCATTGCTGTTTTTGTAGGTTTGTCAAAGATCAAAT         |
| 46 | ROS131_23 | GGTTGTAGATGTGTTGTAATTTCTGAGGCTCTGTTCTGCTCCATTGGTCTATATATTTGTTTTGGTACCAGTACCATGCTGTGTTACTGTAGCTTTGTAATATAGTTGAAGTCAGG      |
| 47 | ROS131_24 | TAGCATGATGCCTCCAAGTTGTTCTTTTGTAGGATTGCTTGGCTACATGGGGTCTTCTTTGATTCTATGTGAAATTTAAAATAACTTTTTCTAATTCTATGAAGAATGTCAACGG       |
| 48 | ROS131_25 | TAGTTAGATGAGAATAGCATTGAATCTATAAATACTCTGGGAGAAATGGCCATTTTCATGATACTCATTATTCTGTCCATGGGGATGGAATGTTTTCCATTTATTGTGCTCTTCT       |
| 49 | ROS131_26 | TATTTCTTGAGCAATGGTTGTAGTTTTCTTGAAGAGTCTTACATCCCTTGTAGCTGTATTCTGATGATTTTATTCTCTTTGTAGCTATTGTGAATGGGAGTTCATTCATGAT          |
| 50 | ROS131_27 | TTGGCTCTGCTTGCCTATTGTTGGTGTAAAGGAATGCTTGTGATTTTTGCACATTGATTTTTATCTTGAGACTTTGCTGAAGTTGCTTATCAGTTCAAGAAGTTTTGGGCTGAGAT      |

|    |           |                                                                                                                        |
|----|-----------|------------------------------------------------------------------------------------------------------------------------|
| 51 | ROS131_28 | GATGGGGTTTTCTAAATACAAAATCATGTCATCTGCAAACAGAGACAACCTGACTTCCTCTCTTCTATTTGAATACCCTTATTTCTTCTCTTGCCTGATTGCCCTGACCAGAACCTC  |
| 52 | ROS131_29 | CAATACTATGTTGAATAGGAGTGGTGAGAGTGGACACCCTGTCTTGACTGTTTTCAAAGGGAATTCTCCAGGTTTTGCTCATTCAATATGATATTGGCTGTAGGTTTTGCATAAAT   |
| 53 | ROS131_30 | AGTTCTTATTTAGAGATATGTTCCATAAAAACCTAGTTTATTGAGAGTTTTAACATAAAGGGATGTTGATGTTGAATTTATCAAAGGCCTTTCTGCATCTATTCAGATAATCGT     |
| 54 | ROS131_31 | GTGATTTTTGTCTTGGTCTGTTTATGTGATGGATTACATTTATTGATTTGCATATGTTGAATCAGCCTTGCATCCCAGGGATGAAGCCGACTTGTTCTGTTGGATATGTTTTTGAT   |
| 55 | ROS131_32 | GTGCTGCTGGATTCAAGTTGCCAGTATTTATTGAGGATTTTTACATCAATGTTTCATCAGGTATATTGGCCCCAAGTTTGTGTTGTGCTCTTCCCAGTTTTGGTATCAGGATGATGCT |
| 56 | ROS131_33 | GGCTTCATAAAATGAGTTAGGAAGGAATTCCTCTTTCCATTGTTTGGAACAGTTTCAGAAGGAATGGTACCAGCTCCTCTTTGATTTCTGGTAGAATTCAGCTGTGAATCCATCTGG  |
| 57 | ROS131_34 | TCCTGGGCTTTTTTGGTTGGTAGTCTATAATTACTGCCTCCATTCCAGAGCTTGCTACTGGTCTAGTCAGGGATTCAACTTCTTCTGGTTTAGTCTTGGTGTATGCATCCAGGAATG  |
| 58 | ROS131_35 | TATCATTCTCTAGATTTCTAGTTATTTGCATAGAAGAGTTATAGTATTATCTGGTGGTATTTGTATTTCTGTGGGGTCAAGTGGTATATCCCCTTATCATTTTTTTTGTGTC       |
| 59 | ROS131_36 | TATTTGATTCTTCTGTCTCCTTCTTATTTCTCTAGCTAGTGGTATATTTGTTATTTATTTATTTTTAAAAAACCAGGCTCCTGGATGTTGATTTTTTTGGAGGGCTTTTTG        |
| 60 | ROS131_37 | TGCTTTGTCTCCTCAGTCTTCTCTGATCTTAGTATTTCTGTCTTCCAGCTTTTGGATTAGTTTGTCTTGCCTCTCTAGCTCTTTAATTGTGATGTTAGGGTGACGATTTG         |
| 61 | ROS131_38 | AGATCTTTCTGGCTTCTAATGTGGGCATTTAGTCTATGAATTTCTCTTAACTGCTTTAGTTGTGCCAGAGATTCTGGTACATTGTCTCTGTTCTCATTGTTTCAAAGAAT         |
| 62 | ROS131_39 | TATTTATTTCTGCCTTAATTCATTATTTACCCAGGAGCCATTCAAGGAGCAAGTGTTCATTTCCAGGAAATGTGTGGTTTTGAGTGAGTTTCTAATCCTGGGTTCTAATTTGATTG   |
| 63 | ROS131_40 | CTCTGTGGTCTGAGAGACTGTTTGTATGATTTCAAGCTCTTTGCATTTGCTGAGGAGTGTCTTACTTCCAATTATGTGGTAGATTTAGAATAAGTACCATGTGGCACTCAGAAGAATG |
| 64 | ROS131_41 | TATATTCTGTTGATTTGGGCTAGAAAGTTCTGTAGACATCTACTAGGTCCTGATCCAGAGCTAAGTTCAAGTCTGAATATCCTGTTAATTTCTGTCTTGTGATCTGTCTAATA      |
| 65 | ROS131_42 | CTGGCAGTGGGGTGTGAAGTTTCCCACTACTATTGCGTGGCAGTCTAAGTCTTTGTAGGTCTCTAAGAACTTACTTTGTGAGTCTGGGTGCTCTTGTATTGGGTGCATATATATTCA  |
| 66 | ROS131_43 | GAATAGTAACTCTTCTGTTGAATTGTTCCCTTTACCATTATATAATGCCCTTCTTTGTCTATTTGATCTTTGTTGGTTAAAGTCTGTTTTGTCAGAGACTAGGATTGCAACCCCTC   |
| 67 | ROS131_44 | TTTTTTTTTTTTGCTTCCATATGCTTGGTAAATTTTCTCAATCCCTTATTTTGGCCTGTGTGTCTTTGCATGTAAGATAGATCTCCTGAATACAACACACCAATGGGTCTTG       |
| 68 | ROS131_45 | ACTCCTATCCAATTTGCCAGTCTGTATCTTTAATTGGGGCATTAGCCCTTTACATTTAAGGTAGGTATTGTTATGTGAGTTTATCCTGTCCACCATGATGCTATTTGGTTATTTTG   |
| 69 | ROS131_46 | CATGCTAGTTGATGCAGTTTCTCATAGTGCATTGATCTTTATAGTTTGGTGTGTTTTGCAATGGCTGGTACCAGTTTTTCTTCCATATTTAGTGCTTATTTCAAGGAGCTGTTGCA   |
| 70 | ROS131_47 | GGGCAGGCCTGGTGGTAACAAAATCCCTCAGCATTTGCTTGTCTGGAAGGATTTATTTCTCCTTCACTTATGAAGCTTAGTTTGGCTGGATATGAAATTCGGGTTGAAAATCTTTT   |
| 71 | ROS131_48 | CTTTAAGAATGTTGATGTTGCCCCCAATCTCTTCTGTTTGTAGGGTTATGTTGAGAGGTCCACTGTTAGTCTGATGGCGTCCCTTTGTAGGTAACCTGGCCTTTCTCTCTGGCTGC   |
| 72 | ROS131_49 | CCTTAACAGTTTTTACTTGATTTCAACCTTGAGAATCTGATGATTATGTCTTGGGGTGTGATCTTCTCGTGGAGTATCTAATGGTGTCTCTGTGTTTCCGAATTTGCATGTTGGC    |
| 73 | ROS131_50 | CTGTCTGCTAGGTTGGGGAAGTTCTCCTGGATAATATCCCGAAGGGTGTTCACAGTGTTCATTTTCCCCTCTCCTCTGGTACTCCAAGCTATCATAGGTTCAAGTCTTTTAT       |
| 74 | ROS131_51 | GAAGTCTCATATTTCTGGAGGCTTTATTCATTCCTTTTCTCTCTTCTTCTGTCAGCATGCTTATTTCAATAAGGTAGTCTTCAAACCTGATATCTTCTTCCACTTG             |
| 75 | ROS131_52 | GTGCTCAGCTGTTGACACTTGTGATGCTTACGAAGTCTTGTGCTGTGTTTTTCCAGCCCCATCAGGCCATTTGTGTTCTCTCTAAACTGATTATCTAGTTAGCAATTCCTCAA      |
| 76 | ROS131_53 | CTTTTTATCAAGGTTCTTAGCTTCTTGCATTGGGTTAGAACATACTCCTTAGCTCATCATAGTTTTTCTACCCATCTTGTGAAGCCTACTTCTGTCAGTTCATCCATCTGATCCTCC  |

|     |           |                                                                                                                              |
|-----|-----------|------------------------------------------------------------------------------------------------------------------------------|
| 77  | ROS131_54 | GCCCAGTTCGACCCTTAATGGAGACATTGTGATCATTAGAGGAGAAGAGGCACTCTGGCCTTTGGGTTTTAGCATTTTTTTATTGGTTCTTTCTCACCTTCGTGAGTTGTCTA            |
| 78  | ROS131_55 | GTTGTGGTCTTTAGAGCTGCTGACCCTGTATGGGTTTTTTGGGGGCCCTGTTGTTGTTGTATGATGATGCTGTTGTTGTCACTTTCTGCTTATTTGTTTTCTTCAATAGTCA             |
| 79  | ROS131_56 | CTTCCCTCTTCTGTAGGGCTGCTGCAGTTTGTGGGGTTCACCTTAGGCCCTTATTCATCTGATTTGCTCCCACGCTGGATATGTAAGTCAAGGAGGCTGGAGAGCAGCAAAAATGGGTG      |
| 80  | ROS131_57 | TCTGCTCCTTCTTCTGGGACCTCTGACTTCAAGGGGCACCAACCTGATGCCAGTAGGATCGCTCCTGTATAGGGTGTCTGACAATCCCTGTTGGAGGGTCTCACCCAGTTGGGTGGCAC      |
| 81  | ROS131_58 | CAGGAGGAGGACCCATTTAACGAAGCACTTTGTCCCTGGTGGAGAGGGTGTGTTTTGCTGTGGGAAAGCCCACTTGTCTGGGCTTCCAGATTCTCAGAAGTACCAGGAGGAGAGGCT        |
| 82  | ROS131_59 | AAGTCTGTTGGTCCGCAGAGACTGCAGCCACCCTCCCCTAGGGGCTCAGGCCAGGGAGATCTGAATTCTGTCCCTGAGCCTCTGGCTGCAGTTACTGAAGATTCTGCAGGGAAGCCC        |
| 83  | ROS131_60 | CACCCACTGAGGAAGGATGGGTGAGGGTTAGACCTGAAGAGGCACTCTGGCCGCTGACTACCACAGCTGGTGTGTTGGGTTGTGGCGACAAGTCTGGGACCAAGCTGTCCAGCCTCGCT      |
| 84  | ROS131_61 | GGCTCCCGCAGGGGAAAAGCACAGCCTGGAGCTATAGAAATGGATGCTGCATTTCTCCCGCCGAGGGAGATTAGCGTGTAGGCAGTTGGGAGTCCAGTGTGGTGTGCTGCCCT            |
| 85  | ROS131_62 | CCCTCAAGGAGCTCAAAGGGCTTAGACAGCAGGCAGCAGAAGCCTGTGCTGGTACCCTCCCGAGGGAGTTCAGTAAGCTTAGGCAGATTCCAGCTGAGAGGCCATAAGAATCTGTAC        |
| 86  | ROS131_63 | ATTCTAGGGTTGGGATGCTAGGCCTCGGTGGCATGGGATCGAGAGTGGGATCTTCCAATCCATGAGTTGCACAGTCTTTGGAAAAGCAATTTCCCGGCTGGGTAGCCTGCTCGCTCGC       |
| 87  | ROS131_64 | CGCTCCCCTGGCTGGAGGGGAGGGGTTCCCTTCCCGTGTGGTCTCAGGTGGGCTCACTGCTCTTCTCTCTGTGGGTACGCCAGCCTTCTAGTCAATTTTGTAGAGCGAAT               |
| 88  | ROS131_65 | CTAGATACTTCCCGGTGAAGGACTCACACACTTATTATGGTTTTTTCAATAGGAACCTCTGAACGGAGTTGCTTCTAGTCGGCCATCTTGGCCCCGCTCTGAATATTTCTTAATGT         |
| 89  | ROS132_1  | GGTATGTGTGTTTGCAAAGTACTTGTAAATGACAAAGAACTAAGAAGATAATTATAAAGTAATCAAAGTAACACTATTTATGCAATGTATTTATATACAAACACAAAGATCTTTAGTT       |
| 90  | ROS132_2  | AAAGGACTCACATGCATCATTACGTTCTTTGCTCAATTCCTAGACGTTGGTCTGGCATGCTAATTATAACAGATCACGTCATTTCTCAGAAATCTTAAGTCTCATTGACACTTTATG        |
| 91  | ROS132_3  | GAAATTGTTGATCATAGGCTCATGCAACCAAGTATTAACCTAATATCAGTTTTGTTAAAAAGCTTAGCTGATGTTAATGTTAAATAATGATGGCATGTAAATTCCTGATGATAATTTG       |
| 92  | ROS132_4  | CTTAGCAAGTGAATACTCTAGTGAGAAATGGTGTGAAGTAGATATTTCTCATACTGTAAAATTAGGTCAGGTTCTGAAATGGTCTGAAGTGTAGAGGTCACACAGGATTCTGTAT          |
| 93  | ROS132_5  | TCATTGGGAAGATTACAGTTTGAATGTGTTCCAGGGACTGAAAACACACCGTCGATGAAAACCAAGCCTGATGAACAGCCTCAGACCTGGCCAGTACGGGAGCAGTGAACCATAA          |
| 94  | ROS132_6  | CTGGCTTAGAAGGACTGATTTATGCAACTTGAAGGGAGAAATCCAAATCCAAAGACACTCTCTCACAGGACTATGAAACCATCTTTAAGAAGTCCAAGGACAAAAGTCACTTCC           |
| 95  | ROS132_7  | ATAATTATAGTCTGGCAACTTGATCTTTAGATCTATTTTGTCTCATCTGGCTCTGGCATTCCATAACCTTAAAAATGTTCTGTTCTACTAGAGAATCCCTTGGCCCTTATTTT            |
| 96  | ROS132_8  | TAATTGAAACCTCCTGAAGTTTCTGTTGCTGTTTTATGCAAGAGTAAATACATTCTAACCTGCAGAACTGTCTTGGTGGTTTTGTGACTGTAATGATGTTTCAATCAGGTCACACA         |
| 97  | ROS132_9  | TCAGTTTTTGTAGGACCTCTTTGTGTGTTACCTGAGTAACCTTAAAGTGTACTAAAATGACTCCATCTAAATACTTTGCATACTCTTGTCCAGGTTCCACTGTCAGGACAT              |
| 98  | ROS132_10 | AGACTATAGGATGACTGAATGATTGTTGTAACCTTCAAGTGTCTCAAATAAGTCTTCAAGTGTACTAAAATGACTCCATCTAAATACTTTGCATACTCTTGTCCAGGTTCCACTGTCAGGACAT |
| 99  | ROS132_11 | TGAACTTGGGAGTTGAACAAGCCTTATTAGTTTCCAAGGGTTGCCAATAAAGGACCACCAACTGGGTGGCTTGAACAGTAGACATTTATTCTTACAGCTCTAGAGGTTAGAAGTCTG        |
| 100 | ROS132_12 | AAACCAACGTATCAGCGGACTGCTTGTCTGATGGTCTAGGGCAGAAATCCATCTTGCCTTAGCTTCTGGCGTTTACTGGCAGTCTTGGTATTCTTGGCTCGTAGGTTGCATCAC           |
| 101 | ROS132_13 | TGTCATCATCACCTCTGCATCACAGGTGTTCTCTGTGTCAAATTTCCCTCTTCTTATGCAAGTGCAGTCTTGGATTAGGGTCCACCCTAAACTACTATGACCTCATCTTAACCTG          |
| 102 | ROS132_14 | ATTACATTTGTCAAGATCTTATTTCTAAACAAGGTACATTAATAATTTCTGAGTGGGTATGAATTTGGGAGGACATGACTCAATCCAGTACACAAACCATGTTTAAATGCTTGTCTT        |

|     |           |                                                                                                                          |
|-----|-----------|--------------------------------------------------------------------------------------------------------------------------|
| 103 | ROS132_15 | TTCTTTTTGAACTTAAGTTTCCTCATCTGTAATGGAGATGATAATATCTATCTTATCTCTTTAAGCTGTTGTGGACTCAGTGAATTAACAACGTTATGTAAGCCCCAGTACAG        |
| 104 | ROS132_16 | TATGTTGTAATAGAAAGGTGCTCAACCAACATCAGAATCTCTTTCTTTCTCAATGGCCATTGTGTAGAGCCACTTCACAAATCTCAAGGGCCTCTTTCTTTGGATCAGAGTTGTT      |
| 105 | ROS132_17 | TGGTTAAACAGTGAAATGGCCAATGCTAAAGGTGAGACGTCACAAAATGTGTAACACACTCTGCTCTAATGCTTTGCTCAGGATGGTCTTAAAGGGACCCTCAGCTCCGGGGAACAGC   |
| 106 | ROS132_18 | TGTGACCAACTCTGCTGCCCTGCTGCTCCCGATGTTCTTACCCTTTCCCTGCCTCTTATGAGGGCCAGCCTTCACTCTCTGTTGGTCTTCAGAAGGATGAGTCAATTAGCAGGAATAGAA |
| 107 | ROS132_19 | CCAGATTCTCCACATATCCCTAAGCTTACCCTGGATTGGCACCAAGTCTAAAATATTGCGGTCTGAAAAGTTTCCAGCTGAAATATTCTTATTGTTAGAGAAGACATAATGGAAG      |
| 108 | ROS132_20 | ACCTTGAGCTTGCCTTTGATGATTCTGTAAGAGTCAATCCAGTTATGTCTTTGAACCCAGCCCTTGTGCTCCTTCCATGTTCAAATGAAAACAATTGGATTGACTTTGAGGTGGAA     |
| 109 | ROS132_21 | TGTAGGTCAATACAAAAGGAAGCAACGAGCCTCAGAATCTCAGATATAATGATAACTTTGGTAGCTGAACTGTCACACTTTCCTTATCAATTTTGTATTCTGTATTTTATTGAAATATGG |
| 110 | ROS132_22 | CATAAGTAACTACAAATATGTAAGAGTCAAAATGAGAAAATGGAACTTCCAGTTAAAATCATGGAATAATTGTCTTATAGGTTTGAATTCTGGAGAAAAGTTTACCATGCT          |
| 111 | ROS132_23 | GTTAGTATAGGAAAAGGTAAGTACTCAGCTCTCTTACCCTGATTACTCACAGTTTTCTGGTGGGCTGAGTTAATTGGTCCATGCCTCACTAGGATCACTATAAAACCATGCTGTTAG    |
| 112 | ROS132_24 | CATCTGTGTTGCCAGATTATGGGAGAGGAATGAGGTCAAGGGTAAATTGTGCCAAAGGACTCTCTGGCGTTCACTACTAAGAAGATCTATGAACAACACTAGAAATAACAGGTATATTG  |
| 113 | ROS133_1  | GGTATGTTACCATGTCTGTCTACACTAGCTTATTACCTAAAGGTTCAAGTAAATATATCAGTACACTTCTAACATTAGCAATAGATAATGGTACTATATATATATATATATATAT      |
| 114 | ROS133_2  | ATATATATATATAATCTTATTATCCAAACTATTAACTATTCCATTATGATGTGATGTTCTTCTAAAACATCATTATCATCATGTCATTTTTCTCCCAATAATAATCAGCCACCCCT     |
| 115 | ROS133_3  | TAATTCCTACCACATCAATCCATGCTCCTAATTAGGCTTCCAAGGCTGTTCAATCTGTTCTATCCAGCCATATAATTCTATTACATTATACCAGCCTTATGACCACTCTACATTA      |
| 116 | ROS133_4  | TACATAACAGGCTAAGACCTTTGTTCTCCCAATATCTACCTCTCCACTGTGATTTTTATTTAGTTTATGATATATTGCTTTCTAATCACATAGGCAGGAAATCTCAGTGCCAT        |
| 117 | ROS133_5  | ATGTGATTTTTCCCTCTACTCAGTAATCAGGTCCTGTTGATTTTACCATCTTGATTTTTCTCTGATGAGTTCTCATCTTCTCTTCCACTTGGCTTTCCTAATTTAAGGTATCATTTT    |
| 118 | ROS133_6  | TTGCCTGTGCCCTTGACTTACGCATACTGCTGACAGTAAATTTAGTTGAAGCACAGGCTGGATTACTTAATCCCTCTGAAATACCCACAATGGCTCTCCATTTACTGCTTTCAGAAAT   |
| 119 | ROS133_7  | CAGCTACAAACTTCTTTGTGGCATGTGAGGTCTTCTGTAATTTATCTCCAAATTGTGGTTTATCTTTTCCAATTTTATGTCTGTGCTGTAGCCATATCAGACCAGTAAAAAGTTTTAT   |
| 120 | ROS133_8  | GTCACCTAGTCTTTGGCCCTGTGTTGCCTCAGCCTAGAATACAGGTCCCACTACCTACCCTGTGCCCTTAGCTGTGATTTCTATTATTTTCTGCAATTGAAATCTTCTCA           |
| 121 | ROS133_9  | TCCTCAAGACTTAAATGAACTCATCATAATGCTTACCTGATGCTCCTTAGTCAAATGAATTATTGCATTTTATACACTCACATGCTATATAAACTTACATGATTCTTGTTTATATTAT   |
| 122 | ROS133_10 | AGTTAGTTATCTAGTTAGTTGTGTACAGAAGTTTGTACCCAGCTCAGCAAATTTTTCTGAAAAGAACCAATAGTAAATATGTTAGACTTTGCAGGCTACATGTGATCTCTGTAGCAT    |
| 123 | ROS133_11 | GTTCTCTTTTCTTTTCTGTTCTCTTTTCTCTCTCTTTTAAAAATAACACTTTACAAAGTAAACTTATTATAGCTAATAGGGGTACAAAATCAGGCTATAGCCAGA                |
| 124 | ROS133_12 | TTTGGTCTCATGCCATAGTTTGGCAGACTCTGGCCTACGTGTTGTTTCTCTACACAACGAACTACCTAAGAGAAATTACCATGTTTATTCTCAGTTAATATCCATGAAATTA         |
| 125 | ROS133_13 | ATATGTATGAAGATATTATACAAAATAAATGCCAACTATTTAGTATCCAAAGACTGAGATTTCTGGTCTAAATTTATTAAGATATATATGTTTCTAAGTCATTTTAAAGTAG         |
| 126 | ROS133_14 | AAGATTGAGTGGATATATCCAGTGGTTGTTGCTCTGCAAAAAAAGCAAAAACACCTTGCTTTTGATTTACATGGCATAAACACTGTCTGTATGGATGCTTCAAGCTACCAACG        |
| 127 | ROS133_15 | GTCTAACAACTGGCTTGCAAAAATCCAGTAGTAGCTGCTATATTACTCTGTGTGCTTAGGTAGAGCTGGGGCAACTTAGCTTTTATCTATGAATTAATTTCTTTTCTGATTTA        |
